# Supplementary material for: Characterization, Expression Profiling, and Functional Analysis of PtDef, a Defensin-Encoding Gene From Populus trichocarpa
Source: Front Microbiol. 2020 Feb 7;11:106. doi: 10.3389/fmicb.2020.00106 (PMC7018670; doi:10.3389/fmicb.2020.00106)
Supplement: TABLE S2 — Kyoto Encyclopedia of Genes and Genomes (KEGG) pathway annotation of differentially expressed genes (DEGs). [file Table_2.XLSX]

## Sheet: Sheet1
#Term	Database	ID	Input number	Background number	P-Value	Corrected P-Value	Input	KEGG_ID/KO	Entrez_ID	Gene Name	Hyperlink
Citrate cycle (TCA cycle)	KEGG PATHWAY	ebl00020	13	26	0.00922642	0.471471	gene1311|gene701|gene1629|gene4154|gene699|gene698|gene697|gene1412|gene4153|gene4152|gene4155|gene700|gene702	ebl:ECD_01253|ebl:ECD_00684|ebl:ECD_01580|ebl:ECD_04025|ebl:ECD_00682|ebl:ECD_00681|ebl:ECD_00680|ebl:ECD_01349|ebl:ECD_04024|ebl:ECD_04023|ebl:ECD_04026|ebl:ECD_00683|ebl:ECD_00685|	| | | | | | | | | | | | |	acnA|sdhB|fumC|frdB|sdhD|sdhC|gltA|ydbK|frdC|frdD|frdA|sdhA|sucA	http://www.genome.jp/kegg-bin/show_pathway?ebl00020/ebl:ECD_01349%09red/ebl:ECD_04023%09red/ebl:ECD_00685%09red/ebl:ECD_00684%09red/ebl:ECD_00683%09red/ebl:ECD_00682%09red/ebl:ECD_00681%09red/ebl:ECD_04026%09red/ebl:ECD_01253%09red/ebl:ECD_04025%09red/ebl:ECD_00680%09red/ebl:ECD_04024%09red/ebl:ECD_01580%09red
Butanoate metabolism	KEGG PATHWAY	ebl00650	15	36	0.0183416	0.471471	gene699|gene3459|gene701|gene2585|gene2586|gene4154|gene1518|gene698|gene1412|gene4153|gene4152|gene4155|gene700|gene952|gene1548	ebl:ECD_00682|ebl:ECD_03365|ebl:ECD_00684|ebl:ECD_02517|ebl:ECD_02518|ebl:ECD_04025|ebl:ECD_01451|ebl:ECD_00681|ebl:ECD_01349|ebl:ECD_04024|ebl:ECD_04023|ebl:ECD_04026|ebl:ECD_00683|ebl:ECD_00907|ebl:ECD_01482|	| | | | | | | | | | | | | | |	sdhD|gadA|sdhB|gabD|gabT|frdB|gadB|sdhC|ydbK|frdC|frdD|frdA|sdhA|pflB|sad	http://www.genome.jp/kegg-bin/show_pathway?ebl00650/ebl:ECD_01451%09red/ebl:ECD_03365%09red/ebl:ECD_02517%09red/ebl:ECD_00907%09red/ebl:ECD_04023%09red/ebl:ECD_02518%09red/ebl:ECD_00684%09red/ebl:ECD_00683%09red/ebl:ECD_04026%09red/ebl:ECD_00681%09red/ebl:ECD_00682%09red/ebl:ECD_01482%09red/ebl:ECD_04025%09red/ebl:ECD_01349%09red/ebl:ECD_04024%09red
Ribosome	KEGG PATHWAY	ebl03010	26	77	0.0194744	0.471471	gene3259|gene3258|gene3257|gene3256|gene3255|gene3254|gene3253|gene3252|gene3237|gene3236|gene2156|gene3244|gene3235|gene168|gene3260|gene3248|gene3172|gene3245|gene3246|gene3242|gene3243|gene3976|gene3977|gene4199|gene3280|gene3281	ebl:ECD_03171|ebl:ECD_03170|ebl:ECD_03169|ebl:ECD_03168|ebl:ECD_03167|ebl:ECD_03166|ebl:ECD_03165|ebl:ECD_03164|ebl:ECD_03149|ebl:ECD_03148|ebl:ECD_02115|ebl:ECD_03156|ebl:ECD_03147|ebl:ECD_00167|ebl:ECD_03172|ebl:ECD_03160|ebl:ECD_03091|ebl:ECD_03157|ebl:ECD_03158|ebl:ECD_03154|ebl:ECD_03155|ebl:ECD_03859|ebl:ECD_03860|ebl:ECD_04067|ebl:ECD_03192|ebl:ECD_03193|	| | | | | | | | | | | | | | | | | | | | | | | | | |	rplC|rplD|rplW|rplB|rpsS|rplV|rpsC|rplP|rpsM|rpsK|rplY|rplF|rpsD|rpsB|rpsJ|rplX|rplM|rpsH|rpsN|rpsE|rplR|rplK|rplA|rpsF|rpsG|rpsL	http://www.genome.jp/kegg-bin/show_pathway?ebl03010/ebl:ECD_03091%09red/ebl:ECD_03860%09red/ebl:ECD_02115%09red/ebl:ECD_03147%09red/ebl:ECD_03160%09red/ebl:ECD_03167%09red/ebl:ECD_03166%09red/ebl:ECD_03165%09red/ebl:ECD_03164%09red/ebl:ECD_03169%09red/ebl:ECD_03168%09red/ebl:ECD_03149%09red/ebl:ECD_03148%09red/ebl:ECD_03859%09red/ebl:ECD_03170%09red/ebl:ECD_03171%09red/ebl:ECD_03172%09red/ebl:ECD…
Oxidative phosphorylation	KEGG PATHWAY	ebl00190	16	41	0.0235509	0.471471	gene397|gene2256|gene2257|gene2258|gene701|gene4228|gene393|gene4154|gene1027|gene699|gene698|gene4153|gene1028|gene4152|gene4155|gene700	ebl:ECD_00383|ebl:ECD_02209|ebl:ECD_02210|ebl:ECD_02211|ebl:ECD_00684|ebl:ECD_04095|ebl:ECD_00379|ebl:ECD_04025|ebl:ECD_00981|ebl:ECD_00682|ebl:ECD_00681|ebl:ECD_04024|ebl:ECD_00982|ebl:ECD_04023|ebl:ECD_04026|ebl:ECD_00683|	| | | | | | | | | | | | | | | |	cyoA|nuoF|nuoE|nuoC|sdhB|ppa|cyoE|frdB|appC|sdhD|sdhC|frdC|appB|frdD|frdA|sdhA	http://www.genome.jp/kegg-bin/show_pathway?ebl00190/ebl:ECD_00383%09red/ebl:ECD_04023%09red/ebl:ECD_00684%09red/ebl:ECD_00683%09red/ebl:ECD_04026%09red/ebl:ECD_00681%09red/ebl:ECD_00682%09red/ebl:ECD_04095%09red/ebl:ECD_02209%09red/ebl:ECD_04025%09red/ebl:ECD_00981%09red/ebl:ECD_00982%09red/ebl:ECD_04024%09red/ebl:ECD_00379%09red/ebl:ECD_02210%09red/ebl:ECD_02211%09red
Carbon metabolism	KEGG PATHWAY	ebl01200	33	108	0.0277336	0.471471	gene2696|gene493|gene3886|gene3887|gene3888|gene2830|gene4077|gene4152|gene1311|gene2851|gene4154|gene699|gene698|gene697|gene701|gene700|gene702|gene2124|gene2069|gene1696|gene2412|gene2413|gene1879|gene4153|gene2842|gene4155|gene2822|gene1752|gene2820|gene1629|gene1435|gene1412|gene2370	ebl:ECD_02624|ebl:ECD_00479|ebl:ECD_03777|ebl:ECD_03778|ebl:ECD_03779|ebl:ECD_02744|ebl:ECD_03951|ebl:ECD_04023|ebl:ECD_01253|ebl:ECD_02765|ebl:ECD_04025|ebl:ECD_00682|ebl:ECD_00681|ebl:ECD_00680|ebl:ECD_00684|ebl:ECD_00683|ebl:ECD_00685|ebl:ECD_02083|ebl:ECD_02025|ebl:ECD_01645|ebl:ECD_02355|ebl:ECD_02356|ebl:ECD_01825|ebl:ECD_04024|ebl:ECD_02756|ebl:ECD_04026|ebl:ECD_02737|ebl:ECD_01701|ebl:ECD…	| | | | | | | | | | | | | | | | | | | | | | | | | | | | | | | | |	eno|folD|fdoI|fdoH|fdoG|serA|fdhF|frdD|acnA|tktA|frdB|sdhD|sdhC|gltA|sdhB|sdhA|sucA|yeiG|fbaB|pykF|talA|tktB|pykA|frdC|fbaA|frdA|gcvT|katE|gcvP|fumC|gapC|ydbK|cysK	http://www.genome.jp/kegg-bin/show_pathway?ebl01200/ebl:ECD_04023%09red/ebl:ECD_04026%09red/ebl:ECD_04025%09red/ebl:ECD_04024%09red/ebl:ECD_02735%09red/ebl:ECD_02737%09red/ebl:ECD_01349%09red/ebl:ECD_02756%09red/ebl:ECD_02356%09red/ebl:ECD_00685%09red/ebl:ECD_00684%09red/ebl:ECD_00683%09red/ebl:ECD_00682%09red/ebl:ECD_00681%09red/ebl:ECD_00680%09red/ebl:ECD_02314%09red/ebl:ECD_02624%09red/ebl:ECD…
Nicotinate and nicotinamide metabolism	KEGG PATHWAY	ebl00760	9	20	0.0443569	0.586586	gene109|gene1548|gene2531|gene2585|gene1620|gene1760|gene727|gene3956|gene1621	ebl:ECD_00108|ebl:ECD_01482|ebl:ECD_02468|ebl:ECD_02517|ebl:ECD_01571|ebl:ECD_01709|ebl:ECD_00703|ebl:ECD_03847|ebl:ECD_01572|	| | | | | | | | |	nadC|sad|nadB|gabD|pntB|nadE|nadA|sthA|pntA	http://www.genome.jp/kegg-bin/show_pathway?ebl00760/ebl:ECD_01572%09red/ebl:ECD_02517%09red/ebl:ECD_01571%09red/ebl:ECD_02468%09red/ebl:ECD_01709%09red/ebl:ECD_00703%09red/ebl:ECD_00108%09red/ebl:ECD_03847%09red/ebl:ECD_01482%09red
Alanine, aspartate and glutamate metabolism	KEGG PATHWAY	ebl00250	12	31	0.0483071	0.586586	gene1064|gene3719|gene1548|gene2531|gene3459|gene2585|gene2586|gene1518|gene1179|gene2262|gene3864|gene450	ebl:ECD_01017|ebl:ECD_03628|ebl:ECD_01482|ebl:ECD_02468|ebl:ECD_03365|ebl:ECD_02517|ebl:ECD_02518|ebl:ECD_01451|ebl:ECD_01129|ebl:ECD_02215|ebl:ECD_03755|ebl:ECD_00436|	| | | | | | | | | | | |	putA|asnA|sad|nadB|gadA|gabD|gabT|gadB|purB|yfbQ|glnA|ybaS	http://www.genome.jp/kegg-bin/show_pathway?ebl00250/ebl:ECD_01451%09red/ebl:ECD_03365%09red/ebl:ECD_02517%09red/ebl:ECD_02468%09red/ebl:ECD_01017%09red/ebl:ECD_03755%09red/ebl:ECD_03628%09red/ebl:ECD_02518%09red/ebl:ECD_01482%09red/ebl:ECD_00436%09red/ebl:ECD_02215%09red/ebl:ECD_01129%09red
Polyketide sugar unit biosynthesis	KEGG PATHWAY	ebl00523	4	6	0.0727715	0.613761	gene2007|gene2009|gene2010|gene2008	ebl:ECD_01944|ebl:ECD_01946|ebl:ECD_01947|ebl:ECD_01945|	| | | |	ybl99|rfbD|rfbB|NA	http://www.genome.jp/kegg-bin/show_pathway?ebl00523/ebl:ECD_01947%09red/ebl:ECD_01946%09red/ebl:ECD_01945%09red/ebl:ECD_01944%09red
Microbial metabolism in diverse environments	KEGG PATHWAY	ebl01120	60	238	0.0754975	0.613761	gene2679|gene165|gene2696|gene3|gene2676|gene2674|gene2675|gene1941|gene493|gene1021|gene3886|gene3887|gene3888|gene2830|gene4077|gene3299|gene4152|gene1548|gene4053|gene2585|gene2586|gene1503|gene3537|gene699|gene698|gene697|gene3459|gene700|gene702|gene2681|gene2680|gene918|gene2124|gene701|gene2922|gene2069|gene1696|gene2412|gene1030|gene2102|gene1879|gene4153|gene2842|gene4155|gene4154|gene10…	ebl:ECD_02607|ebl:ECD_00164|ebl:ECD_02624|ebl:ECD_00004|ebl:ECD_02602|ebl:ECD_02600|ebl:ECD_02601|ebl:ECD_01882|ebl:ECD_00479|ebl:ECD_00975|ebl:ECD_03777|ebl:ECD_03778|ebl:ECD_03779|ebl:ECD_02744|ebl:ECD_03951|ebl:ECD_03210|ebl:ECD_04023|ebl:ECD_01482|ebl:ECD_03927|ebl:ECD_02517|ebl:ECD_02518|ebl:ECD_01436|ebl:ECD_03443|ebl:ECD_00682|ebl:ECD_00681|ebl:ECD_00680|ebl:ECD_03365|ebl:ECD_00683|ebl:ECD…	| | | | | | | | | | | | | | | | | | | | | | | | | | | | | | | | | | | | | | | | | | | | | | | | | | | | | | | | | | | |	cysH|dapD|eno|thrC|cysD|cysC|cysN|NA|folD|hyaA|fdoI|fdoH|fdoG|serA|fdhF|argD|frdD|sad|aphA|gabD|gabT|adhP|aldB|sdhD|sdhC|gltA|gadA|sdhA|sucA|cysJ|cysI|ltaE|yeiG|sdhB|glcD|fbaB|pykF|talA|appA|dld|pykA|frdC|fbaA|frdA|frdB|hyaB|acnA|narZ|narY|hybO|glnA|tktA|fumC|gapC|gadB|ydbK|cysK|dapF|ldhA|tktB	http://www.genome.jp/kegg-bin/show_pathway?ebl01120/ebl:ECD_00684%09red/ebl:ECD_04023%09red/ebl:ECD_04026%09red/ebl:ECD_04025%09red/ebl:ECD_04024%09red/ebl:ECD_02601%09red/ebl:ECD_01482%09red/ebl:ECD_00479%09red/ebl:ECD_02848%09red/ebl:ECD_03210%09red/ebl:ECD_01426%09red/ebl:ECD_01349%09red/ebl:ECD_02756%09red/ebl:ECD_00875%09red/ebl:ECD_02355%09red/ebl:ECD_03443%09red/ebl:ECD_00683%09red/ebl:ECD…
Biosynthesis of antibiotics	KEGG PATHWAY	ebl01130	52	203	0.0776925	0.613761	gene2696|gene2010|gene2011|gene2676|gene2675|gene2821|gene2830|gene1696|gene3299|gene4152|gene1311|gene124|gene1237|gene2822|gene1503|gene3952|gene699|gene698|gene697|gene2820|gene701|gene700|gene702|gene2009|gene2008|gene918|gene2007|gene1064|gene2922|gene2069|gene2806|gene2412|gene2413|gene1879|gene4153|gene2842|gene4155|gene4154|gene1752|gene3751|gene2262|gene348|gene1179|gene2851|gene1629|gen…	ebl:ECD_02624|ebl:ECD_01947|ebl:ECD_01948|ebl:ECD_02602|ebl:ECD_02601|ebl:ECD_02736|ebl:ECD_02744|ebl:ECD_01645|ebl:ECD_03210|ebl:ECD_04023|ebl:ECD_01253|ebl:ECD_00123|ebl:ECD_01183|ebl:ECD_02737|ebl:ECD_01436|ebl:ECD_03843|ebl:ECD_00682|ebl:ECD_00681|ebl:ECD_00680|ebl:ECD_02735|ebl:ECD_00684|ebl:ECD_00683|ebl:ECD_00685|ebl:ECD_01946|ebl:ECD_01945|ebl:ECD_00875|ebl:ECD_01944|ebl:ECD_01017|ebl:ECD…	| | | | | | | | | | | | | | | | | | | | | | | | | | | | | | | | | | | | | | | | | | | | | | | | | | | |	eno|rfbB|galF|cysD|cysN|gcvH|serA|pykF|argD|frdD|acnA|gcd|ispE|gcvT|adhP|argC|sdhD|sdhC|gltA|gcvP|sdhB|sdhA|sucA|rfbD|NA|ltaE|ybl99|putA|glcD|fbaB|idi|talA|tktB|pykA|frdC|fbaA|frdA|frdB|katE|ilvC|yfbQ|aroL|purB|tktA|fumC|aroG|entD|gapC|menF|ydbK|dapF|cysK	http://www.genome.jp/kegg-bin/show_pathway?ebl01130/ebl:ECD_00335%09red/ebl:ECD_04023%09red/ebl:ECD_04026%09red/ebl:ECD_04025%09red/ebl:ECD_04024%09red/ebl:ECD_02744%09red/ebl:ECD_03843%09red/ebl:ECD_00549%09red/ebl:ECD_02848%09red/ebl:ECD_01129%09red/ebl:ECD_02737%09red/ebl:ECD_02736%09red/ebl:ECD_03210%09red/ebl:ECD_03685%09red/ebl:ECD_02602%09red/ebl:ECD_01349%09red/ebl:ECD_02756%09red/ebl:ECD…
RNA degradation	KEGG PATHWAY	ebl03018	7	16	0.0794278	0.613761	gene4171|gene4142|gene2696|gene2755|gene1129|gene3757|gene3760	ebl:ECD_04039|ebl:ECD_04013|ebl:ECD_02624|ebl:ECD_02678|ebl:ECD_01080|ebl:ECD_03658|ebl:ECD_03661|	| | | | | | |	hfq|groL|eno|rppH|rne|rhlB|rho	http://www.genome.jp/kegg-bin/show_pathway?ebl03018/ebl:ECD_01080%09red/ebl:ECD_03661%09red/ebl:ECD_04039%09red/ebl:ECD_04013%09red/ebl:ECD_03658%09red/ebl:ECD_02624%09red/ebl:ECD_02678%09red
Glyoxylate and dicarboxylate metabolism	KEGG PATHWAY	ebl00630	13	40	0.0999125	0.707714	gene473|gene1311|gene2821|gene2822|gene2922|gene3886|gene3887|gene697|gene3888|gene3864|gene4077|gene1752|gene2820	ebl:ECD_00459|ebl:ECD_01253|ebl:ECD_02736|ebl:ECD_02737|ebl:ECD_02848|ebl:ECD_03777|ebl:ECD_03778|ebl:ECD_00680|ebl:ECD_03779|ebl:ECD_03755|ebl:ECD_03951|ebl:ECD_01701|ebl:ECD_02735|	| | | | | | | | | | | | |	glxR|acnA|gcvH|gcvT|glcD|fdoI|fdoH|gltA|fdoG|glnA|fdhF|katE|gcvP	http://www.genome.jp/kegg-bin/show_pathway?ebl00630/ebl:ECD_01701%09red/ebl:ECD_01253%09red/ebl:ECD_00680%09red/ebl:ECD_03755%09red/ebl:ECD_00459%09red/ebl:ECD_02736%09red/ebl:ECD_03778%09red/ebl:ECD_03779%09red/ebl:ECD_03777%09red/ebl:ECD_02848%09red/ebl:ECD_02735%09red/ebl:ECD_02737%09red/ebl:ECD_03951%09red
Biosynthesis of secondary metabolites	KEGG PATHWAY	ebl01110	71	298	0.122109	0.790633	gene1994|gene2696|gene701|gene3|gene2821|gene1696|gene2232|gene3299|gene2842|gene1311|gene1312|gene124|gene4036|gene4037|gene3788|gene1237|gene4015|gene4154|gene1503|gene2987|gene3537|gene699|gene698|gene697|gene2236|gene2820|gene3459|gene700|gene702|gene3719|gene3783|gene918|gene2458|gene1995|gene1064|gene393|gene2922|gene2069|gene2806|gene2412|gene2413|gene1879|gene4153|gene4152|gene4155|gene31…	ebl:ECD_01932|ebl:ECD_02624|ebl:ECD_00684|ebl:ECD_00004|ebl:ECD_02736|ebl:ECD_01645|ebl:ECD_02187|ebl:ECD_03210|ebl:ECD_02756|ebl:ECD_01253|ebl:ECD_01254|ebl:ECD_00123|ebl:ECD_03911|ebl:ECD_03912|ebl:ECD_03685|ebl:ECD_01183|ebl:ECD_03891|ebl:ECD_04025|ebl:ECD_01436|ebl:ECD_02913|ebl:ECD_03443|ebl:ECD_00682|ebl:ECD_00681|ebl:ECD_00680|ebl:ECD_02191|ebl:ECD_02735|ebl:ECD_03365|ebl:ECD_00683|ebl:ECD…	| | | | | | | | | | | | | | | | | | | | | | | | | | | | | | | | | | | | | | | | | | | | | | | | | | | | | | | | | | | | | | | | | | | | | | |	ybl87|eno|sdhB|thrC|gcvH|pykF|menE|argD|fbaA|acnA|ribA|gcd|ubiC|ubiA|dapF|ispE|metH|frdB|adhP|ribB|aldB|sdhD|sdhC|gltA|menD|gcvP|gadA|sdhA|sucA|asnA|hemC|ltaE|guaB|ybl88|putA|cyoE|glcD|fbaB|idi|talA|tktB|pykA|frdC|frdD|frdA|ispB|katE|ilvC|miaA|yfbQ|aroL|ldcC|wrbA|purB|malP|tktA|argC|ribE|gcvT|fumC|ubiD|aroG|entD|gapC|menF|gadB|glpC|cysK|gltX|glpA|glpB	http://www.genome.jp/kegg-bin/show_pathway?ebl01110/ebl:ECD_01932%09red/ebl:ECD_00335%09red/ebl:ECD_03443%09red/ebl:ECD_04023%09red/ebl:ECD_00363%09red/ebl:ECD_04026%09red/ebl:ECD_04025%09red/ebl:ECD_04024%09red/ebl:ECD_03628%09red/ebl:ECD_03843%09red/ebl:ECD_00549%09red/ebl:ECD_00379%09red/ebl:ECD_02848%09red/ebl:ECD_01129%09red/ebl:ECD_03365%09red/ebl:ECD_02913%09red/ebl:ECD_02736%09red/ebl:ECD…
Riboflavin metabolism	KEGG PATHWAY	ebl00740	4	8	0.130222	0.790633	gene2987|gene377|gene1312|gene3838	ebl:ECD_02913|ebl:ECD_00363|ebl:ECD_01254|ebl:ECD_03735|	| | | |	ribB|ribE|ribA|fre	http://www.genome.jp/kegg-bin/show_pathway?ebl00740/ebl:ECD_00363%09red/ebl:ECD_03735%09red/ebl:ECD_02913%09red/ebl:ECD_01254%09red
Methane metabolism	KEGG PATHWAY	ebl00680	9	27	0.141602	0.802409	gene2696|gene2124|gene2069|gene3886|gene3887|gene3888|gene2842|gene2830|gene4077	ebl:ECD_02624|ebl:ECD_02083|ebl:ECD_02025|ebl:ECD_03777|ebl:ECD_03778|ebl:ECD_03779|ebl:ECD_02756|ebl:ECD_02744|ebl:ECD_03951|	| | | | | | | | |	eno|yeiG|fbaB|fdoI|fdoH|fdoG|fbaA|serA|fdhF	http://www.genome.jp/kegg-bin/show_pathway?ebl00680/ebl:ECD_02756%09red/ebl:ECD_02083%09red/ebl:ECD_02624%09red/ebl:ECD_02025%09red/ebl:ECD_03778%09red/ebl:ECD_03779%09red/ebl:ECD_02744%09red/ebl:ECD_03777%09red/ebl:ECD_03951%09red
Ubiquinone and other terpenoid-quinone biosynthesis	KEGG PATHWAY	ebl00130	7	20	0.158571	0.820927	gene2232|gene1054|gene4036|gene4037|gene3837|gene2236|gene2237	ebl:ECD_02187|ebl:ECD_01007|ebl:ECD_03911|ebl:ECD_03912|ebl:ECD_03734|ebl:ECD_02191|ebl:ECD_02192|	| | | | | | |	menE|wrbA|ubiC|ubiA|ubiD|menD|menF	http://www.genome.jp/kegg-bin/show_pathway?ebl00130/ebl:ECD_01007%09red/ebl:ECD_03912%09red/ebl:ECD_03911%09red/ebl:ECD_03734%09red/ebl:ECD_02187%09red/ebl:ECD_02191%09red/ebl:ECD_02192%09red
Streptomycin biosynthesis	KEGG PATHWAY	ebl00521	4	9	0.164185	0.820927	gene2007|gene2009|gene2010|gene2008	ebl:ECD_01944|ebl:ECD_01946|ebl:ECD_01947|ebl:ECD_01945|	| | | |	ybl99|rfbD|rfbB|NA	http://www.genome.jp/kegg-bin/show_pathway?ebl00521/ebl:ECD_01947%09red/ebl:ECD_01946%09red/ebl:ECD_01945%09red/ebl:ECD_01944%09red
Sulfur metabolism	KEGG PATHWAY	ebl00920	10	33	0.178891	0.838746	gene2681|gene2679|gene2676|gene2674|gene2675|gene2680|gene2379|gene2378|gene2380|gene2370	ebl:ECD_02609|ebl:ECD_02607|ebl:ECD_02602|ebl:ECD_02600|ebl:ECD_02601|ebl:ECD_02608|ebl:ECD_02323|ebl:ECD_02322|ebl:ECD_02324|ebl:ECD_02314|	| | | | | | | | | |	cysJ|cysH|cysD|cysC|cysN|cysI|cysW|cysA|cysU|cysK	http://www.genome.jp/kegg-bin/show_pathway?ebl00920/ebl:ECD_02609%09red/ebl:ECD_02608%09red/ebl:ECD_02601%09red/ebl:ECD_02600%09red/ebl:ECD_02324%09red/ebl:ECD_02602%09red/ebl:ECD_02322%09red/ebl:ECD_02323%09red/ebl:ECD_02607%09red/ebl:ECD_02314%09red
Pyruvate metabolism	KEGG PATHWAY	ebl00620	14	51	0.198631	0.838746	gene1415|gene919|gene4154|gene1941|gene1696|gene3537|gene2102|gene1879|gene1412|gene4153|gene4152|gene4155|gene1629|gene952	ebl:ECD_01352|ebl:ECD_00876|ebl:ECD_04025|ebl:ECD_01882|ebl:ECD_01645|ebl:ECD_03443|ebl:ECD_02063|ebl:ECD_01825|ebl:ECD_01349|ebl:ECD_04024|ebl:ECD_04023|ebl:ECD_04026|ebl:ECD_01580|ebl:ECD_00907|	| | | | | | | | | | | | | |	ldhA|poxB|frdB|NA|pykF|aldB|dld|pykA|ydbK|frdC|frdD|frdA|fumC|pflB	http://www.genome.jp/kegg-bin/show_pathway?ebl00620/ebl:ECD_01349%09red/ebl:ECD_01825%09red/ebl:ECD_00907%09red/ebl:ECD_04023%09red/ebl:ECD_00876%09red/ebl:ECD_03443%09red/ebl:ECD_01352%09red/ebl:ECD_04026%09red/ebl:ECD_04025%09red/ebl:ECD_01580%09red/ebl:ECD_01645%09red/ebl:ECD_01882%09red/ebl:ECD_04024%09red/ebl:ECD_02063%09red
One carbon pool by folate	KEGG PATHWAY	ebl00670	5	14	0.20722	0.838746	gene3226|gene4015|gene493|gene2822|gene2828	ebl:ECD_03138|ebl:ECD_03891|ebl:ECD_00479|ebl:ECD_02737|ebl:ECD_02743|	| | | | |	fmt|metH|folD|gcvT|ygfA	http://www.genome.jp/kegg-bin/show_pathway?ebl00670/ebl:ECD_03138%09red/ebl:ECD_00479%09red/ebl:ECD_03891%09red/ebl:ECD_02737%09red/ebl:ECD_02743%09red
beta-Alanine metabolism	KEGG PATHWAY	ebl00410	5	14	0.20722	0.838746	gene2117|gene2116|gene3459|gene2586|gene1518	ebl:ECD_02076|ebl:ECD_02075|ebl:ECD_03365|ebl:ECD_02518|ebl:ECD_01451|	| | | | |	yeiA|yeiT|gadA|gabT|gadB	http://www.genome.jp/kegg-bin/show_pathway?ebl00410/ebl:ECD_01451%09red/ebl:ECD_02076%09red/ebl:ECD_02075%09red/ebl:ECD_03365%09red/ebl:ECD_02518%09red
Nitrotoluene degradation	KEGG PATHWAY	ebl00633	3	7	0.23153	0.894549	gene1022|gene1021|gene2946	ebl:ECD_00976|ebl:ECD_00975|ebl:ECD_02873|	| | |	hyaB|hyaA|hybO	http://www.genome.jp/kegg-bin/show_pathway?ebl00633/ebl:ECD_00975%09red/ebl:ECD_00976%09red/ebl:ECD_02873%09red
Biosynthesis of amino acids	KEGG PATHWAY	ebl01230	27	116	0.294254	0.999598	gene165|gene2696|gene3|gene2830|gene3299|gene1311|gene2851|gene4015|gene697|gene2262|gene3864|gene3719|gene918|gene159|gene2069|gene1696|gene2412|gene2413|gene1879|gene2842|gene3952|gene3751|gene348|gene731|gene1435|gene3788|gene2370	ebl:ECD_00164|ebl:ECD_02624|ebl:ECD_00004|ebl:ECD_02744|ebl:ECD_03210|ebl:ECD_01253|ebl:ECD_02765|ebl:ECD_03891|ebl:ECD_00680|ebl:ECD_02215|ebl:ECD_03755|ebl:ECD_03628|ebl:ECD_00875|ebl:ECD_00158|ebl:ECD_02025|ebl:ECD_01645|ebl:ECD_02355|ebl:ECD_02356|ebl:ECD_01825|ebl:ECD_02756|ebl:ECD_03843|ebl:ECD_03652|ebl:ECD_00335|ebl:ECD_00707|ebl:ECD_01371|ebl:ECD_03685|ebl:ECD_02314|	| | | | | | | | | | | | | | | | | | | | | | | | | | |	dapD|eno|thrC|serA|argD|acnA|tktA|metH|gltA|yfbQ|glnA|asnA|ltaE|mtn|fbaB|pykF|talA|tktB|pykA|fbaA|argC|ilvC|aroL|aroG|gapC|dapF|cysK	http://www.genome.jp/kegg-bin/show_pathway?ebl01230/ebl:ECD_00335%09red/ebl:ECD_03685%09red/ebl:ECD_03628%09red/ebl:ECD_03843%09red/ebl:ECD_03210%09red/ebl:ECD_00158%09red/ebl:ECD_02756%09red/ebl:ECD_02356%09red/ebl:ECD_02355%09red/ebl:ECD_00680%09red/ebl:ECD_03891%09red/ebl:ECD_02215%09red/ebl:ECD_02314%09red/ebl:ECD_02624%09red/ebl:ECD_01645%09red/ebl:ECD_02744%09red/ebl:ECD_03652%09red/ebl:ECD…
Glycerophospholipid metabolism	KEGG PATHWAY	ebl00564	8	30	0.307581	0.999598	gene380|gene1935|gene2397|gene2214|gene2398|gene2210|gene2212|gene2213	ebl:ECD_00366|ebl:ECD_01877|ebl:ECD_02340|ebl:ECD_02169|ebl:ECD_02341|ebl:ECD_02165|ebl:ECD_02167|ebl:ECD_02168|	| | | | | | | |	pgpA|pgsA|eutC|glpC|eutB|glpQ|glpA|glpB	http://www.genome.jp/kegg-bin/show_pathway?ebl00564/ebl:ECD_02340%09red/ebl:ECD_02341%09red/ebl:ECD_00366%09red/ebl:ECD_02165%09red/ebl:ECD_02167%09red/ebl:ECD_02168%09red/ebl:ECD_02169%09red/ebl:ECD_01877%09red
Metabolic pathways	KEGG PATHWAY	ebl01100	149	701	0.31453	0.999598	gene2679|gene165|gene2676|gene2674|gene2675|gene1107|gene3886|gene3887|gene3602|gene3888|gene2830|gene2076|gene1064|gene1311|gene1312|gene4015|gene2822|gene1503|gene2065|gene2064|gene701|gene700|gene702|gene2475|gene4403|gene170|gene3360|gene1935|gene2069|gene2068|gene2828|gene2063|gene3956|gene2067|gene2066|gene952|gene3751|gene1228|gene1229|gene4170|gene3864|gene493|gene1226|gene1179|gene2370|g…	ebl:ECD_02607|ebl:ECD_00164|ebl:ECD_02602|ebl:ECD_02600|ebl:ECD_02601|ebl:ECD_01058|ebl:ECD_03777|ebl:ECD_03778|ebl:ECD_03505|ebl:ECD_03779|ebl:ECD_02744|ebl:ECD_02032|ebl:ECD_01017|ebl:ECD_01253|ebl:ECD_01254|ebl:ECD_03891|ebl:ECD_02737|ebl:ECD_01436|ebl:ECD_02019|ebl:ECD_02018|ebl:ECD_00684|ebl:ECD_00683|ebl:ECD_00685|ebl:ECD_02415|ebl:ECD_04258|ebl:ECD_00169|ebl:ECD_03269|ebl:ECD_01877|ebl:ECD…	| | | | | | | | | | | | | | | | | | | | | | | | | | | | | | | | | | | | | | | | | | | | | | | | | | | | | | | | | | | | | | | | | | | | | | | | | | | | | | | | | | | | | | | | | | | | | | | | | | | | | | | | | | | | | | | | | | | | | | | | | | | | | | | | | | | | | | | | | | | | | | | | | | | | |	cysH|dapD|cysD|cysC|cysN|pyrC|fdoI|fdoH|gmk|fdoG|serA|thiM|putA|acnA|ribA|metH|gcvT|adhP|gatB|gatC|sdhB|sdhA|sucA|pepB|deoA|pyrH|malP|pgsA|fbaB|gatY|ygfA|gatD|sthA|gatZ|gatA|pflB|ilvC|dhaL|dhaK|miaA|glnA|folD|treA|purB|cysK|nadC|ygcF|eno|thrC|gcvH|yeiA|yeiT|rfaG|rfaP|nadE|otsB|queF|NA|argD|ribE|ubiC|ubiA|gcvP|ispE|gabD|gabT|betB|gapC|yfbQ|gadA|cysJ|cysI|gudD|guaB|cyoE|idi|frdC|frdD|frdA|frdB|dnaE…	http://www.genome.jp/kegg-bin/show_pathway?ebl01100/ebl:ECD_01165%09red/ebl:ECD_03628%09red/ebl:ECD_00379%09red/ebl:ECD_02848%09red/ebl:ECD_03863%09red/ebl:ECD_02913%09red/ebl:ECD_02018%09red/ebl:ECD_02019%09red/ebl:ECD_03146%09red/ebl:ECD_00685%09red/ebl:ECD_00684%09red/ebl:ECD_00683%09red/ebl:ECD_00682%09red/ebl:ECD_00681%09red/ebl:ECD_02017%09red/ebl:ECD_02743%09red/ebl:ECD_01932%09red/ebl:ECD…
Arginine biosynthesis	KEGG PATHWAY	ebl00220	5	18	0.346865	0.999598	gene3299|gene2262|gene3864|gene450|gene3952	ebl:ECD_03210|ebl:ECD_02215|ebl:ECD_03755|ebl:ECD_00436|ebl:ECD_03843|	| | | | |	argD|yfbQ|glnA|ybaS|argC	http://www.genome.jp/kegg-bin/show_pathway?ebl00220/ebl:ECD_02215%09red/ebl:ECD_03210%09red/ebl:ECD_00436%09red/ebl:ECD_03843%09red/ebl:ECD_03755%09red
Glycolysis / Gluconeogenesis	KEGG PATHWAY	ebl00010	10	41	0.357823	0.999598	gene2696|gene2069|gene1503|gene1696|gene1435|gene3537|gene1879|gene1412|gene2842|gene1146	ebl:ECD_02624|ebl:ECD_02025|ebl:ECD_01436|ebl:ECD_01645|ebl:ECD_01371|ebl:ECD_03443|ebl:ECD_01825|ebl:ECD_01349|ebl:ECD_02756|ebl:ECD_01097|	| | | | | | | | | |	eno|fbaB|adhP|pykF|gapC|aldB|pykA|ydbK|fbaA|ptsG	http://www.genome.jp/kegg-bin/show_pathway?ebl00010/ebl:ECD_01349%09red/ebl:ECD_01371%09red/ebl:ECD_01097%09red/ebl:ECD_03443%09red/ebl:ECD_01436%09red/ebl:ECD_01825%09red/ebl:ECD_02624%09red/ebl:ECD_02025%09red/ebl:ECD_01645%09red/ebl:ECD_02756%09red
Taurine and hypotaurine metabolism	KEGG PATHWAY	ebl00430	2	6	0.40306	0.999598	gene3459|gene1518	ebl:ECD_03365|ebl:ECD_01451|	| |	gadA|gadB	http://www.genome.jp/kegg-bin/show_pathway?ebl00430/ebl:ECD_01451%09red/ebl:ECD_03365%09red
Galactose metabolism	KEGG PATHWAY	ebl00052	9	39	0.425096	0.999598	gene310|gene2011|gene4117|gene2068|gene2063|gene2067|gene2066|gene2065|gene2064	ebl:ECD_00298|ebl:ECD_01948|ebl:ECD_03990|ebl:ECD_02024|ebl:ECD_02017|ebl:ECD_02021|ebl:ECD_02020|ebl:ECD_02019|ebl:ECD_02018|	| | | | | | | | |	lacZ|galF|melA|gatY|gatD|gatZ|gatA|gatB|gatC	http://www.genome.jp/kegg-bin/show_pathway?ebl00052/ebl:ECD_02018%09red/ebl:ECD_02019%09red/ebl:ECD_01948%09red/ebl:ECD_00298%09red/ebl:ECD_02017%09red/ebl:ECD_02021%09red/ebl:ECD_02020%09red/ebl:ECD_02024%09red/ebl:ECD_03990%09red
Lysine degradation	KEGG PATHWAY	ebl00310	3	11	0.430634	0.999598	gene2585|gene185|gene702	ebl:ECD_02517|ebl:ECD_00184|ebl:ECD_00685|	| | |	gabD|ldcC|sucA	http://www.genome.jp/kegg-bin/show_pathway?ebl00310/ebl:ECD_00685%09red/ebl:ECD_00184%09red/ebl:ECD_02517%09red
2-Oxocarboxylic acid metabolism	KEGG PATHWAY	ebl01210	6	26	0.462536	0.999598	gene3299|gene1311|gene697|gene2262|gene3952|gene3751	ebl:ECD_03210|ebl:ECD_01253|ebl:ECD_00680|ebl:ECD_02215|ebl:ECD_03843|ebl:ECD_03652|	| | | | | |	argD|acnA|gltA|yfbQ|argC|ilvC	http://www.genome.jp/kegg-bin/show_pathway?ebl01210/ebl:ECD_03210%09red/ebl:ECD_03652%09red/ebl:ECD_01253%09red/ebl:ECD_00680%09red/ebl:ECD_03843%09red/ebl:ECD_02215%09red
Biosynthesis of siderophore group nonribosomal peptides	KEGG PATHWAY	ebl01053	2	7	0.465676	0.999598	gene553|gene2237	ebl:ECD_00549|ebl:ECD_02192|	| |	entD|menF	http://www.genome.jp/kegg-bin/show_pathway?ebl01053/ebl:ECD_00549%09red/ebl:ECD_02192%09red
Aminobenzoate degradation	KEGG PATHWAY	ebl00627	2	7	0.465676	0.999598	gene1030|gene4053	ebl:ECD_00983|ebl:ECD_03927|	| |	appA|aphA	http://www.genome.jp/kegg-bin/show_pathway?ebl00627/ebl:ECD_03927%09red/ebl:ECD_00983%09red
Glycerolipid metabolism	KEGG PATHWAY	ebl00561	3	12	0.478364	0.999598	gene1228|gene1229|gene4117	ebl:ECD_01174|ebl:ECD_01175|ebl:ECD_03990|	| | |	dhaL|dhaK|melA	http://www.genome.jp/kegg-bin/show_pathway?ebl00561/ebl:ECD_03990%09red/ebl:ECD_01174%09red/ebl:ECD_01175%09red
Selenocompound metabolism	KEGG PATHWAY	ebl00450	4	17	0.485549	0.999598	gene1700|gene2676|gene4015|gene2675	ebl:ECD_01649|ebl:ECD_02602|ebl:ECD_03891|ebl:ECD_02601|	| | | |	sufS|cysD|metH|cysN	http://www.genome.jp/kegg-bin/show_pathway?ebl00450/ebl:ECD_02601%09red/ebl:ECD_01649%09red/ebl:ECD_02602%09red/ebl:ECD_03891%09red
Lysine biosynthesis	KEGG PATHWAY	ebl00300	3	13	0.524129	0.999598	gene3299|gene165|gene3788	ebl:ECD_03210|ebl:ECD_00164|ebl:ECD_03685|	| | |	argD|dapD|dapF	http://www.genome.jp/kegg-bin/show_pathway?ebl00300/ebl:ECD_03210%09red/ebl:ECD_00164%09red/ebl:ECD_03685%09red
Tryptophan metabolism	KEGG PATHWAY	ebl00380	2	8	0.524212	0.999598	gene1752|gene702	ebl:ECD_01701|ebl:ECD_00685|	| |	katE|sucA	http://www.genome.jp/kegg-bin/show_pathway?ebl00380/ebl:ECD_00685%09red/ebl:ECD_01701%09red
Monobactam biosynthesis	KEGG PATHWAY	ebl00261	2	8	0.524212	0.999598	gene2676|gene2675	ebl:ECD_02602|ebl:ECD_02601|	| |	cysD|cysN	http://www.genome.jp/kegg-bin/show_pathway?ebl00261/ebl:ECD_02601%09red/ebl:ECD_02602%09red
Pentose phosphate pathway	KEGG PATHWAY	ebl00030	6	29	0.555776	0.999598	gene2851|gene124|gene2069|gene2412|gene2413|gene2842	ebl:ECD_02765|ebl:ECD_00123|ebl:ECD_02025|ebl:ECD_02355|ebl:ECD_02356|ebl:ECD_02756|	| | | | | |	tktA|gcd|fbaB|talA|tktB|fbaA	http://www.genome.jp/kegg-bin/show_pathway?ebl00030/ebl:ECD_00123%09red/ebl:ECD_02765%09red/ebl:ECD_02756%09red/ebl:ECD_02356%09red/ebl:ECD_02355%09red/ebl:ECD_02025%09red
Porphyrin and chlorophyll metabolism	KEGG PATHWAY	ebl00860	5	24	0.558166	0.999598	gene3275|gene3838|gene2358|gene3783|gene393	ebl:ECD_03187|ebl:ECD_03735|ebl:ECD_02306|ebl:ECD_03680|ebl:ECD_00379|	| | | | |	bfr|fre|gltX|hemC|cyoE	http://www.genome.jp/kegg-bin/show_pathway?ebl00860/ebl:ECD_02306%09red/ebl:ECD_03187%09red/ebl:ECD_00379%09red/ebl:ECD_03680%09red/ebl:ECD_03735%09red
Terpenoid backbone biosynthesis	KEGG PATHWAY	ebl00900	3	14	0.567588	0.999598	gene2806|gene1237|gene3133	ebl:ECD_02721|ebl:ECD_01183|ebl:ECD_03052|	| | |	idi|ispE|ispB	http://www.genome.jp/kegg-bin/show_pathway?ebl00900/ebl:ECD_01183%09red/ebl:ECD_03052%09red/ebl:ECD_02721%09red
Vitamin B6 metabolism	KEGG PATHWAY	ebl00750	2	9	0.578256	0.999598	gene3|gene2844	ebl:ECD_00004|ebl:ECD_02758|	| |	thrC|epd	http://www.genome.jp/kegg-bin/show_pathway?ebl00750/ebl:ECD_02758%09red/ebl:ECD_00004%09red
Glycine, serine and threonine metabolism	KEGG PATHWAY	ebl00260	7	36	0.60786	0.999598	gene918|gene3|gene279|gene2830|gene2822|gene2821|gene2820	ebl:ECD_00875|ebl:ECD_00004|ebl:ECD_00268|ebl:ECD_02744|ebl:ECD_02737|ebl:ECD_02736|ebl:ECD_02735|	| | | | | | |	ltaE|thrC|betB|serA|gcvT|gcvH|gcvP	http://www.genome.jp/kegg-bin/show_pathway?ebl00260/ebl:ECD_00268%09red/ebl:ECD_00004%09red/ebl:ECD_00875%09red/ebl:ECD_02744%09red/ebl:ECD_02735%09red/ebl:ECD_02737%09red/ebl:ECD_02736%09red
Nitrogen metabolism	KEGG PATHWAY	ebl00910	5	27	0.65038	0.999598	gene1493|gene1492|gene921|gene3864|gene305	ebl:ECD_01426|ebl:ECD_01425|ebl:ECD_00878|ebl:ECD_03755|ebl:ECD_00293|	| | | | |	narZ|narY|hcp|glnA|cynT	http://www.genome.jp/kegg-bin/show_pathway?ebl00910/ebl:ECD_03755%09red/ebl:ECD_01426%09red/ebl:ECD_00293%09red/ebl:ECD_00878%09red/ebl:ECD_01425%09red
D-Glutamine and D-glutamate metabolism	KEGG PATHWAY	ebl00471	1	5	0.671196	0.999598	gene450	ebl:ECD_00436|	|	ybaS	http://www.genome.jp/kegg-bin/show_pathway?ebl00471/ebl:ECD_00436%09red
Mismatch repair	KEGG PATHWAY	ebl03430	4	23	0.693477	0.999598	gene3792|gene183|gene2459|gene1976	ebl:ECD_03689|ebl:ECD_00182|ebl:ECD_02401|ebl:ECD_01914|	| | | |	uvrD|dnaE|xseA|sbcB	http://www.genome.jp/kegg-bin/show_pathway?ebl03430/ebl:ECD_01914%09red/ebl:ECD_00182%09red/ebl:ECD_02401%09red/ebl:ECD_03689%09red
Quorum sensing	KEGG PATHWAY	ebl02024	10	56	0.699721	0.999598	gene4171|gene4043|gene1312|gene100|gene3297|gene1371|gene731|gene1518|gene1517|gene3459	ebl:ECD_04039|ebl:ECD_03918|ebl:ECD_01254|ebl:ECD_00099|ebl:ECD_03208|ebl:ECD_03208|ebl:ECD_00707|ebl:ECD_01451|ebl:ECD_01450|ebl:ECD_03365|	| | | | | | | | | |	hfq|zur|ribA|secA|crp|NA|aroG|gadB|gadC|gadA	http://www.genome.jp/kegg-bin/show_pathway?ebl02024/ebl:ECD_01451%09red/ebl:ECD_01450%09red/ebl:ECD_00099%09red/ebl:ECD_03365%09red/ebl:ECD_00707%09red/ebl:ECD_03208%09red/ebl:ECD_04039%09red/ebl:ECD_01254%09red/ebl:ECD_03918%09red
Cyanoamino acid metabolism	KEGG PATHWAY	ebl00460	1	6	0.726874	0.999598	gene3719	ebl:ECD_03628|	|	asnA	http://www.genome.jp/kegg-bin/show_pathway?ebl00460/ebl:ECD_03628%09red
Pyrimidine metabolism	KEGG PATHWAY	ebl00240	11	64	0.745196	0.999598	gene183|gene4403|gene3234|gene170|gene2117|gene2116|gene1107|gene2206|gene2205|gene3980|gene3981	ebl:ECD_00182|ebl:ECD_04258|ebl:ECD_03146|ebl:ECD_00169|ebl:ECD_02076|ebl:ECD_02075|ebl:ECD_01058|ebl:ECD_02161|ebl:ECD_02160|ebl:ECD_03863|ebl:ECD_03864|	| | | | | | | | | | |	dnaE|deoA|rpoA|pyrH|yeiA|yeiT|pyrC|nrdB|nrdA|rpoB|rpoC	http://www.genome.jp/kegg-bin/show_pathway?ebl00240/ebl:ECD_00182%09red/ebl:ECD_03146%09red/ebl:ECD_00169%09red/ebl:ECD_04258%09red/ebl:ECD_03863%09red/ebl:ECD_02160%09red/ebl:ECD_02161%09red/ebl:ECD_02076%09red/ebl:ECD_03864%09red/ebl:ECD_02075%09red/ebl:ECD_01058%09red
Propanoate metabolism	KEGG PATHWAY	ebl00640	6	37	0.758615	0.999598	gene299|gene2958|gene2586|gene301|gene300|gene952	ebl:ECD_00287|ebl:ECD_02884|ebl:ECD_02518|ebl:ECD_00289|ebl:ECD_00288|ebl:ECD_00907|	| | | | | |	prpC|yqhD|gabT|prpE|prpD|pflB	http://www.genome.jp/kegg-bin/show_pathway?ebl00640/ebl:ECD_00289%09red/ebl:ECD_00288%09red/ebl:ECD_00907%09red/ebl:ECD_02518%09red/ebl:ECD_00287%09red/ebl:ECD_02884%09red
Purine metabolism	KEGG PATHWAY	ebl00230	15	87	0.764543	0.999598	gene183|gene3340|gene1179|gene2458|gene2676|gene3234|gene2674|gene2675|gene1696|gene3602|gene1879|gene2206|gene2205|gene3980|gene3981	ebl:ECD_00182|ebl:ECD_03249|ebl:ECD_01129|ebl:ECD_02400|ebl:ECD_02602|ebl:ECD_03146|ebl:ECD_02600|ebl:ECD_02601|ebl:ECD_01645|ebl:ECD_03505|ebl:ECD_01825|ebl:ECD_02161|ebl:ECD_02160|ebl:ECD_03863|ebl:ECD_03864|	| | | | | | | | | | | | | | |	dnaE|nudE|purB|guaB|cysD|rpoA|cysC|cysN|pykF|gmk|pykA|nrdB|nrdA|rpoB|rpoC	http://www.genome.jp/kegg-bin/show_pathway?ebl00230/ebl:ECD_00182%09red/ebl:ECD_03146%09red/ebl:ECD_03249%09red/ebl:ECD_02400%09red/ebl:ECD_02601%09red/ebl:ECD_01825%09red/ebl:ECD_02160%09red/ebl:ECD_02161%09red/ebl:ECD_01645%09red/ebl:ECD_03505%09red/ebl:ECD_02600%09red/ebl:ECD_03864%09red/ebl:ECD_02602%09red/ebl:ECD_01129%09red/ebl:ECD_03863%09red
Folate biosynthesis	KEGG PATHWAY	ebl00790	3	20	0.772699	0.999598	gene2693|gene2711|gene1890	ebl:ECD_02622|ebl:ECD_02639|ebl:ECD_01836|	| | |	ygcF|queF|nudB	http://www.genome.jp/kegg-bin/show_pathway?ebl00790/ebl:ECD_01836%09red/ebl:ECD_02622%09red/ebl:ECD_02639%09red
Starch and sucrose metabolism	KEGG PATHWAY	ebl00500	5	33	0.794637	0.999598	gene3360|gene1919|gene2011|gene1226|gene1920	ebl:ECD_03269|ebl:ECD_01865|ebl:ECD_01948|ebl:ECD_01172|ebl:ECD_01866|	| | | | |	malP|otsA|galF|treA|otsB	http://www.genome.jp/kegg-bin/show_pathway?ebl00500/ebl:ECD_01172%09red/ebl:ECD_01865%09red/ebl:ECD_01866%09red/ebl:ECD_03269%09red/ebl:ECD_01948%09red
Vancomycin resistance	KEGG PATHWAY	ebl01502	1	8	0.811566	0.999598	gene1219	ebl:ECD_01165|	|	dadX	http://www.genome.jp/kegg-bin/show_pathway?ebl01502/ebl:ECD_01165%09red
Nucleotide excision repair	KEGG PATHWAY	ebl03420	1	8	0.811566	0.999598	gene3792	ebl:ECD_03689|	|	uvrD	http://www.genome.jp/kegg-bin/show_pathway?ebl03420/ebl:ECD_03689%09red
Fructose and mannose metabolism	KEGG PATHWAY	ebl00051	6	41	0.830355	0.999598	gene3550|gene3549|gene2069|gene1994|gene1995|gene2842	ebl:ECD_03455|ebl:ECD_03454|ebl:ECD_02025|ebl:ECD_01932|ebl:ECD_01933|ebl:ECD_02756|	| | | | | |	mtlD|mtlA|fbaB|ybl87|ybl88|fbaA	http://www.genome.jp/kegg-bin/show_pathway?ebl00051/ebl:ECD_02756%09red/ebl:ECD_03455%09red/ebl:ECD_03454%09red/ebl:ECD_02025%09red/ebl:ECD_01932%09red/ebl:ECD_01933%09red
Pantothenate and CoA biosynthesis	KEGG PATHWAY	ebl00770	3	23	0.840891	0.999598	gene2117|gene2116|gene3751	ebl:ECD_02076|ebl:ECD_02075|ebl:ECD_03652|	| | |	yeiA|yeiT|ilvC	http://www.genome.jp/kegg-bin/show_pathway?ebl00770/ebl:ECD_02076%09red/ebl:ECD_03652%09red/ebl:ECD_02075%09red
Tyrosine metabolism	KEGG PATHWAY	ebl00350	2	17	0.856485	0.999598	gene1503|gene2585	ebl:ECD_01436|ebl:ECD_02517|	| |	adhP|gabD	http://www.genome.jp/kegg-bin/show_pathway?ebl00350/ebl:ECD_01436%09red/ebl:ECD_02517%09red
Valine, leucine and isoleucine biosynthesis	KEGG PATHWAY	ebl00290	2	17	0.856485	0.999598	gene2262|gene3751	ebl:ECD_02215|ebl:ECD_03652|	| |	yfbQ|ilvC	http://www.genome.jp/kegg-bin/show_pathway?ebl00290/ebl:ECD_02215%09red/ebl:ECD_03652%09red
Two-component system	KEGG PATHWAY	ebl02020	23	141	0.867785	0.999598	gene3703|gene1023|gene1027|gene1028|gene2053|gene4155|gene3297|gene1371|gene3863|gene3864|gene632|gene4421|gene2328|gene978|gene1937|gene4153|gene4152|gene2162|gene4154|gene1493|gene1492|gene554|gene3996	ebl:ECD_03612|ebl:ECD_00977|ebl:ECD_00981|ebl:ECD_00982|ebl:ECD_01984|ebl:ECD_04026|ebl:ECD_03208|ebl:ECD_03208|ebl:ECD_03754|ebl:ECD_03755|ebl:ECD_00623|ebl:ECD_04277|ebl:ECD_02279|ebl:ECD_00933|ebl:ECD_01879|ebl:ECD_04024|ebl:ECD_04023|ebl:ECD_02120|ebl:ECD_04025|ebl:ECD_01426|ebl:ECD_01425|ebl:ECD_00550|ebl:ECD_03879|	| | | | | | | | | | | | | | | | | | | | | | |	pstS|hyaC|appC|appB|baeR|frdA|crp|NA|glnL|glnA|gltI|arcA|evgA|ompF|NA|frdC|frdD|narP|frdB|narZ|narY|fepA|zraP	http://www.genome.jp/kegg-bin/show_pathway?ebl02020/ebl:ECD_04023%09red/ebl:ECD_04026%09red/ebl:ECD_04025%09red/ebl:ECD_04024%09red/ebl:ECD_00623%09red/ebl:ECD_01425%09red/ebl:ECD_01426%09red/ebl:ECD_00933%09red/ebl:ECD_00977%09red/ebl:ECD_01879%09red/ebl:ECD_02279%09red/ebl:ECD_04277%09red/ebl:ECD_03879%09red/ebl:ECD_00550%09red/ebl:ECD_02120%09red/ebl:ECD_01984%09red/ebl:ECD_03208%09red/ebl:ECD…
Valine, leucine and isoleucine degradation	KEGG PATHWAY	ebl00280	1	10	0.870018	0.999598	gene2586	ebl:ECD_02518|	|	gabT	http://www.genome.jp/kegg-bin/show_pathway?ebl00280/ebl:ECD_02518%09red
DNA replication	KEGG PATHWAY	ebl03030	2	18	0.87584	0.999598	gene183|gene214	ebl:ECD_00182|ebl:ECD_00207|	| |	dnaE|rnhA	http://www.genome.jp/kegg-bin/show_pathway?ebl03030/ebl:ECD_00182%09red/ebl:ECD_00207%09red
Phosphotransferase system (PTS)	KEGG PATHWAY	ebl02060	6	46	0.894862	0.999598	gene3549|gene2754|gene2064|gene2066|gene2065|gene1146	ebl:ECD_03454|ebl:ECD_02677|ebl:ECD_02018|ebl:ECD_02020|ebl:ECD_02019|ebl:ECD_01097|	| | | | | |	mtlA|ptsP|gatC|gatA|gatB|ptsG	http://www.genome.jp/kegg-bin/show_pathway?ebl02060/ebl:ECD_02018%09red/ebl:ECD_02019%09red/ebl:ECD_01097%09red/ebl:ECD_03454%09red/ebl:ECD_02020%09red/ebl:ECD_02677%09red
Amino sugar and nucleotide sugar metabolism	KEGG PATHWAY	ebl00520	5	41	0.909274	0.999598	gene1146|gene3166|gene2011|gene1994|gene1995	ebl:ECD_01097|ebl:ECD_03085|ebl:ECD_01948|ebl:ECD_01932|ebl:ECD_01933|	| | | | |	ptsG|nanA|galF|ybl87|ybl88	http://www.genome.jp/kegg-bin/show_pathway?ebl00520/ebl:ECD_01948%09red/ebl:ECD_01932%09red/ebl:ECD_01933%09red/ebl:ECD_01097%09red/ebl:ECD_03085%09red
Thiamine metabolism	KEGG PATHWAY	ebl00730	1	12	0.910353	0.999598	gene2076	ebl:ECD_02032|	|	thiM	http://www.genome.jp/kegg-bin/show_pathway?ebl00730/ebl:ECD_02032%09red
Homologous recombination	KEGG PATHWAY	ebl03440	3	28	0.915549	0.999598	gene183|gene4381|gene4200	ebl:ECD_00182|ebl:ECD_04239|ebl:ECD_04068|	| | |	dnaE|dnaT|priB	http://www.genome.jp/kegg-bin/show_pathway?ebl03440/ebl:ECD_00182%09red/ebl:ECD_04239%09red/ebl:ECD_04068%09red
Phenylalanine, tyrosine and tryptophan biosynthesis	KEGG PATHWAY	ebl00400	2	21	0.920361	0.999598	gene731|gene348	ebl:ECD_00707|ebl:ECD_00335|	| |	aroG|aroL	http://www.genome.jp/kegg-bin/show_pathway?ebl00400/ebl:ECD_00707%09red/ebl:ECD_00335%09red
Ascorbate and aldarate metabolism	KEGG PATHWAY	ebl00053	1	13	0.925555	0.999598	gene2704	ebl:ECD_02632|	|	gudD	http://www.genome.jp/kegg-bin/show_pathway?ebl00053/ebl:ECD_02632%09red
Cysteine and methionine metabolism	KEGG PATHWAY	ebl00270	3	29	0.925964	0.999598	gene4015|gene159|gene2370	ebl:ECD_03891|ebl:ECD_00158|ebl:ECD_02314|	| | |	metH|mtn|cysK	http://www.genome.jp/kegg-bin/show_pathway?ebl00270/ebl:ECD_00158%09red/ebl:ECD_03891%09red/ebl:ECD_02314%09red
Lipopolysaccharide biosynthesis	KEGG PATHWAY	ebl00540	3	29	0.925964	0.999598	gene3585|gene3584|gene3489	ebl:ECD_03488|ebl:ECD_03487|ebl:ECD_03396|	| | |	rfaG|rfaP|eptB	http://www.genome.jp/kegg-bin/show_pathway?ebl00540/ebl:ECD_03396%09red/ebl:ECD_03487%09red/ebl:ECD_03488%09red
Fatty acid degradation	KEGG PATHWAY	ebl00071	1	14	0.938182	0.999598	gene1503	ebl:ECD_01436|	|	adhP	http://www.genome.jp/kegg-bin/show_pathway?ebl00071/ebl:ECD_01436%09red
Biotin metabolism	KEGG PATHWAY	ebl00780	1	15	0.948669	0.999598	gene1610	ebl:ECD_01562|	|	ynfK	http://www.genome.jp/kegg-bin/show_pathway?ebl00780/ebl:ECD_01562%09red
Arginine and proline metabolism	KEGG PATHWAY	ebl00330	2	25	0.956743	0.999598	gene1064|gene2853	ebl:ECD_01017|ebl:ECD_02767|	| |	putA|speB	http://www.genome.jp/kegg-bin/show_pathway?ebl00330/ebl:ECD_02767%09red/ebl:ECD_01017%09red
Bacterial chemotaxis	KEGG PATHWAY	ebl02030	1	17	0.964613	0.999598	gene2120	ebl:ECD_03637|	|	NA	http://www.genome.jp/kegg-bin/show_pathway?ebl02030/ebl:ECD_03637%09red
beta-Lactam resistance	KEGG PATHWAY	ebl01501	1	18	0.97062	0.999598	gene978	ebl:ECD_00933|	|	ompF	http://www.genome.jp/kegg-bin/show_pathway?ebl01501/ebl:ECD_00933%09red
Protein export	KEGG PATHWAY	ebl03060	1	18	0.97062	0.999598	gene100	ebl:ECD_00099|	|	secA	http://www.genome.jp/kegg-bin/show_pathway?ebl03060/ebl:ECD_00099%09red
Phenylalanine metabolism	KEGG PATHWAY	ebl00360	1	18	0.97062	0.999598	gene1218	ebl:ECD_01164|	|	dadA	http://www.genome.jp/kegg-bin/show_pathway?ebl00360/ebl:ECD_01164%09red
Glutathione metabolism	KEGG PATHWAY	ebl00480	1	19	0.975608	0.999598	gene2475	ebl:ECD_02415|	|	pepB	http://www.genome.jp/kegg-bin/show_pathway?ebl00480/ebl:ECD_02415%09red
Degradation of aromatic compounds	KEGG PATHWAY	ebl01220	1	22	0.986046	0.999598	gene1503	ebl:ECD_01436|	|	adhP	http://www.genome.jp/kegg-bin/show_pathway?ebl01220/ebl:ECD_01436%09red
Peptidoglycan biosynthesis	KEGG PATHWAY	ebl00550	1	23	0.988417	0.999598	gene149	ebl:ECD_00148|	|	mrcB	http://www.genome.jp/kegg-bin/show_pathway?ebl00550/ebl:ECD_00148%09red
Cationic antimicrobial peptide (CAMP) resistance	KEGG PATHWAY	ebl01503	2	35	0.991188	0.999598	gene2392|gene3489	ebl:ECD_02335|ebl:ECD_03396|	| |	amiA|eptB	http://www.genome.jp/kegg-bin/show_pathway?ebl01503/ebl:ECD_02335%09red/ebl:ECD_03396%09red
ABC transporters	KEGG PATHWAY	ebl02010	21	170	0.992512	0.999598	gene910|gene832|gene912|gene632|gene3141|gene911|gene2120|gene908|gene3701|gene3700|gene3703|gene3702|gene2100|gene2282|gene2379|gene2378|gene1884|gene1882|gene1883|gene2380|gene4260	ebl:ECD_00867|ebl:ECD_00778|ebl:ECD_00869|ebl:ECD_00623|ebl:ECD_03060|ebl:ECD_00868|ebl:ECD_03637|ebl:ECD_00865|ebl:ECD_03610|ebl:ECD_03609|ebl:ECD_03612|ebl:ECD_03611|ebl:ECD_02061|ebl:ECD_02235|ebl:ECD_02323|ebl:ECD_02322|ebl:ECD_01830|ebl:ECD_01828|ebl:ECD_01829|ebl:ECD_02324|ebl:ECD_04127|	| | | | | | | | | | | | | | | | | | | | |	artQ|glnH|artP|gltI|mlaF|artI|NA|artJ|pstA|pstB|pstS|pstC|osmF|argT|cysW|cysA|znuB|znuA|znuC|cysU|lptF	http://www.genome.jp/kegg-bin/show_pathway?ebl02010/ebl:ECD_01828%09red/ebl:ECD_01829%09red/ebl:ECD_02322%09red/ebl:ECD_03611%09red/ebl:ECD_03610%09red/ebl:ECD_03060%09red/ebl:ECD_03612%09red/ebl:ECD_04127%09red/ebl:ECD_01830%09red/ebl:ECD_00623%09red/ebl:ECD_02323%09red/ebl:ECD_02235%09red/ebl:ECD_00867%09red/ebl:ECD_03609%09red/ebl:ECD_00865%09red/ebl:ECD_00778%09red/ebl:ECD_03637%09red/ebl:ECD…
Pentose and glucuronate interconversions	KEGG PATHWAY	ebl00040	1	26	0.993377	0.999598	gene2011	ebl:ECD_01948|	|	galF	http://www.genome.jp/kegg-bin/show_pathway?ebl00040/ebl:ECD_01948%09red
Aminoacyl-tRNA biosynthesis	KEGG PATHWAY	ebl00970	11	110	0.995591	0.999598	gene1732|gene1733|gene654|gene1901|gene942|gene3226|gene2807|gene4128|gene3504|gene2358|gene1891	ebl:ECD_01682|ebl:ECD_01683|ebl:ECD_00637|ebl:ECD_01847|ebl:ECD_00897|ebl:ECD_03138|ebl:ECD_02722|ebl:ECD_04000|ebl:ECD_03410|ebl:ECD_02306|ebl:ECD_01837|	| | | | | | | | | | |	pheT|pheS|glnS|argS|serS|fmt|lysS|lysU|glyS|gltX|aspS	http://www.genome.jp/kegg-bin/show_pathway?ebl00970/ebl:ECD_00897%09red/ebl:ECD_01837%09red/ebl:ECD_04000%09red/ebl:ECD_03138%09red/ebl:ECD_02306%09red/ebl:ECD_01682%09red/ebl:ECD_01683%09red/ebl:ECD_02722%09red/ebl:ECD_01847%09red/ebl:ECD_03410%09red/ebl:ECD_00637%09red
Bacterial secretion system	KEGG PATHWAY	ebl03070	1	41	0.999598	0.999598	gene100	ebl:ECD_00099|	|	secA	http://www.genome.jp/kegg-bin/show_pathway?ebl03070/ebl:ECD_00099%09red
